# Supplementary material for: Impact of Down Syndrome on Survival Among Patients With Congenital Heart Disease
Source: PubMed Central journal article supplement — J Am Heart Assoc. 2024 Jan 12;13(2):e031392. doi: 10.1161/JAHA.123.031392 (PMC10926807; doi:10.1161/jaha.123.031392), 2024-01-12

# **SUPPLEMENTAL MATERIAL**

**Table S1. International Classification of Diseases diagnosis codes according to lesion group .**

| Lesion group                      | CHD diagnoses included in the group | ICD-10       | ICD-9 | ICD-8  |
|-----------------------------------|-------------------------------------|--------------|-------|--------|
| 1. Conotruncal defects            | Common truncus                      | Q200         | 745A  | 746.0  |
|                                   | Aortopulmonary septal defect        | Q214         | 745A  | 746.0  |
|                                   | Transposition of the great vessels  | Q201–<br>203 | 745B  | 746.1  |
|                                   | Tetralogy of Fallot                 | Q213         | 745C  | 746.2  |
| 2. Severe non-conotruncal defects | Endocardial cushion defect          | Q212         | 745G  | 746.47 |
|                                   | Common ventricle                    | Q204         | 745D  | 746.37 |
|                                   | Hypoplastic left heart syndrome     | Q234         | 746H  | 746.74 |
| 3. Coarctation of the aorta       | Coarctation of the aorta            | Q251         | 747B  | 747.19 |

|                                                 |                                                                                  |      |      |        |
|-------------------------------------------------|----------------------------------------------------------------------------------|------|------|--------|
| 4. Ventricular septal defect                    | Ventricular septal defect                                                        | Q210 | 745E | 746.39 |
|                                                 |                                                                                  | Q218 | 754W | 746.89 |
| 5. Atrial septal defect                         | Atrial septal defect                                                             | Q211 | 745F | 745.42 |
|                                                 |                                                                                  |      |      | 746.43 |
|                                                 |                                                                                  |      |      | 746.46 |
| 6. Other heart and circulatory system anomalies | All congenital heart disease diagnoses not included in the five categories above |      |      |        |

CHD, congenital heart disease; ICD, International Classification of Diseases.

**Table S2. International Classification of Diseases diagnosis codes for comorbidities and cardiovascular death used in the study.**

| Diagnosis             | ICD-8         | ICD-9         | ICD-10                    |
|-----------------------|---------------|---------------|---------------------------|
| Hypertension          | 400-404       | 401-405       | I10-I15                   |
| Diabetes              | 250           | 250           | E10-E14                   |
| Hyperlipidemia        | 272-272,01    | 272A, 272E    | E780, E782,<br>E784, E785 |
| Atrial fibrillation   | 427.92        | 427D          | I48                       |
| Ischemic stroke       | 433, 434      | 434, 436      | I63, I64                  |
| Myocardial infarction | 410           | 410           | I21                       |
| Cardiovascular death  | 410, 433, 434 | 410, 434, 436 | I21, I63, I64             |

ICD=International Statistical Classification of Diseases

Table S3. Baseline characteristics of CHD patients with DS by birth period

|                                     | <b>1970–1989</b><br><b>(N=956)</b> | <b>1990–2017</b><br><b>(N=2329)</b> | <b>P-value</b> |
|-------------------------------------|------------------------------------|-------------------------------------|----------------|
| Female                              | 500 (52.3%)                        | 1091 (46.8%)                        |                |
| Year of birth, SD,<br>Median (IQR)* | 1980.3±5.7<br>1980 (1975;1985)     | 2003.7±7.8<br>2004 (1997;2010)      | <0.001         |
| Follow-up (years),<br>Median (IQR)* | 25.7±16.2<br>31.6 (4.0;38.5)       | 12.7±8.0<br>12.0 (5.8;19.5)         | <0001          |
| <b>Lesion complexity</b>            |                                    |                                     | <0.001         |
| Complex CHD                         | 517 (54.1%)                        | 921 (39.5%)                         |                |
| -Univentricular heart               | 81 (8.5%)                          | 74 (3.2%)                           |                |
| Non-complex CHD                     | 439 (45.9%)                        | 1408 (60.5%)                        |                |

CHD, congenital heart disease; DS, Down syndrome; SD, standard deviation; IQR, interquartile range. \* Continuous variable.

P<0.05 was considered statistically significant.

**Table S4. Distribution of birth year for patients with CHD and DS and matched controls.**

|                 | <b>CHD and DS<br/>(n=3285)</b> | <b>Controls without DS or CHD<br/>(n=26128)</b> |
|-----------------|--------------------------------|-------------------------------------------------|
| Birth year, (%) |                                |                                                 |
| 1970            | 36 (1.1)                       | 259 (1.0)                                       |
| 1971            | 28 (0.9)                       | 197 (0.8)                                       |
| 1972            | 40 (1.2)                       | 297 (1.1)                                       |
| 1973            | 44 (1.3)                       | 327 (1.3)                                       |
| 1974            | 50 (1.5)                       | 357 (1.4)                                       |
| 1975            | 45 (1.4)                       | 292 (1.1)                                       |
| 1976            | 37 (1.1)                       | 245 (0.9)                                       |
| 1977            | 48 (1.5)                       | 323 (1.2)                                       |

|      |          |           |
|------|----------|-----------|
| 1978 | 42 (1.3) | 256 (1.0) |
| 1979 | 49 (1.5) | 304 (1.2) |
| 1980 | 61 (1.9) | 406 (1.6) |
| 1981 | 45 (1.4) | 301 (1.2) |
| 1982 | 43 (1.3) | 265 (1.0) |
| 1983 | 48 (1.5) | 311 (1.2) |
| 1984 | 50 (1.5) | 319 (1.2) |
| 1985 | 54 (1.6) | 351 (1.3) |
| 1986 | 55 (1.7) | 367 (1.4) |
| 1987 | 60 (1.8) | 394 (1.5) |
| 1988 | 62 (1.9) | 440 (1.7) |
| 1989 | 59 (1.8) | 449 (1.7) |

|      |          |           |
|------|----------|-----------|
| 1990 | 72 (2.2) | 532 (2.0) |
| 1991 | 81 (2.5) | 625 (2.4) |
| 1992 | 85 (2.6) | 666 (2.5) |
| 1993 | 84 (2.6) | 655 (2.5) |
| 1994 | 89 (2.7) | 709 (2.7) |
| 1995 | 73 (2.2) | 564 (2.2) |
| 1996 | 71 (2.2) | 562 (2.2) |
| 1997 | 54 (1.6) | 420 (1.6) |
| 1998 | 69 (2.1) | 539 (2.1) |
| 1999 | 63 (1.9) | 505 (1.9) |
| 2000 | 70 (2.1) | 548 (2.1) |
| 2001 | 90 (2.7) | 728 (2.8) |



|      |           |           |
|------|-----------|-----------|
| 2002 | 89 (2.7)  | 744 (2.8) |
| 2003 | 112 (3.4) | 952 (3.6) |
| 2004 | 86 (2.6)  | 719 (2.8) |
| 2005 | 99 (3.0)  | 829 (3.2) |
| 2006 | 116 (3.5) | 995 (3.8) |
| 2007 | 80 (2.4)  | 682 (2.6) |
| 2008 | 105 (3.2) | 922 (3.5) |
| 2009 | 94 (2.9)  | 803 (3.1) |
| 2010 | 87 (2.6)  | 787 (3.0) |
| 2011 | 101 (3.1) | 894 (3.4) |
| 2012 | 90 (2.7)  | 817 (3.1) |
| 2013 | 76 (2.3)  | 693 (2.7) |

|                                                   |          |           |
|---------------------------------------------------|----------|-----------|
| 2014                                              | 88 (2.7) | 793 (3.0) |
| 2015                                              | 74 (2.3) | 708 (2.7) |
| 2016                                              | 67 (2.0) | 641 (2.5) |
| 2017                                              | 64 (1.9) | 636 (2.4) |
| CHD, congenital heart disease; DS, Down syndrome; |          |           |

**Table S5. Risk of mortality in patients with CHD and DS compared with matched controls by age group and birth period.**

| Age group                                             | HR for mortality (95% CI) |                      |                     |
|-------------------------------------------------------|---------------------------|----------------------|---------------------|
|                                                       | Overall                   | 1970–1989            | 1990–2017           |
| <b>With CHD patients without DS as a reference</b>    |                           |                      |                     |
| 0–0.9 years                                           | 1.35 (1.19–1.53)          | 1.11 (0.93–1.32)     | 1.36 (1.13–1.65)    |
| 1–9 years                                             | 4.70 (4.01–5.50)          | 4.67 (3.92–5.77)     | 3.70 (2.81–4.88)    |
| 10–17 years                                           | 2.71 (1.89–3.88)          | 3.19 (2.07–4.93)     | 1.98 (1.03–3.81)    |
| 18+ years                                             | 3.28 (2.61–4.13)          | 3.70 (2.92–4.68)     | 0.82 (0.26–2.60)    |
| <b>With controls without CHD or DS as a reference</b> |                           |                      |                     |
| 0–0.9 years                                           | 26.91 (20.81–34.79)       | 46.76 (29.53–74.04)  | 17.69 (12.82–24.42) |
| 1–9 years                                             | 55.64 (37.86–81.77)       | 70.03 (41.67–117.68) | 37.33 (20.85–66.86) |

|             |                     |                      |                     |
|-------------|---------------------|----------------------|---------------------|
| 10–17 years | 44.19 (19.59–99.69) | 56.86 (19.73–163.88) | 29.43 (8.10–106.95) |
| 18+ years   | 10.43 (7.72–14.10)  | 11.62 (8.49–15.89)   | 2.78 (0.77–10.11)   |

CHD, congenital heart disease; DS, Down syndrome; HR, hazard ratio; CI, confidence interval.

**Table S6. Risk of mortality in patients with CHD and DS compared with matched CHD patients without DS and compared with matched controls, according to gender, lesion complexity and divided by age groups and birth periods.**

|                                                  | <b>HR for mortality (95% CI)</b> |                  |
|--------------------------------------------------|----------------------------------|------------------|
| <b>With CHD patients without DS as reference</b> |                                  |                  |
|                                                  | 1970-1989                        | 1990-2017        |
| <b>Male</b>                                      |                                  |                  |
| All                                              | 2.04 (1.75–2.37)                 | 1.41 (1.13–1.76) |
| 0–0.9 years                                      | 1.11 (0.87–1.41)                 | 1.20 (0.92–1.58) |
| 1–9 years                                        | 4.62 (3.50–6.09)                 | 2.69 (1.74–4.16) |
| 10-17 years                                      | 4.14 (2.42–7.09)                 | 1.10 (0.34–3.52) |
| 18+ years                                        | 3.09 (2.20–4.34)                 | 1.21 (0.38–3.91) |
| <b>Female</b>                                    |                                  |                  |
| All                                              | 2.17 (1.86–2.53)                 | 2.10 (1.71–2.58) |
| 0–0.9 years                                      | 1.31 (0.88–1.45)                 | 1.56 (1.19–2.03) |
| 1–9 years                                        | 4.92 (3.75–6.46)                 | 4.86 (3.38–6.97) |

|                          |                  |                  |
|--------------------------|------------------|------------------|
| 10-17 years              | 2.23 (1.07–4.67) | 3.03 (1.36–6.74) |
| 18+ years                | 4.61 (3.31–6.43) | N/A              |
| <b>Lesion complexity</b> |                  |                  |
| Complex                  |                  |                  |
| All                      | 0.99 (0.87–1.13) | 0.57 (0.47–0.69) |
| 0–0.9 years              | 0.52 (0.42–0.64) | 0.42 (0.33–0.54) |
| 1–9 years                | 1.81 (1.44–2.28) | 1.37 (0.95–1.98) |
| 10-17 years              | 1.44 (0.87–2.40) | 1.09 (0.50–2.39) |
| 18+ years                | 2.46 (1.80–3.38) | N/A              |
| Non-complex              |                  |                  |
| All                      | 1.85 (1.52–2.26) | 1.68 (1.33–2.13) |
| 0–0.9 years              | 1.14 (0.84–1.55) | 1.43 (1.06–1.92) |
| 1–9 years                | 4.42 (3.03–6.46) | 3.11 (1.99–4.87) |
| 10-17 years              | 2.11 (0.85–5.23) | 0.95 (0.23–3.88) |
| 18+ years                | 2.60 (1.75–3.89) | 1.80 (0.56–5.79) |
| <b>Age groups</b>        |                  |                  |

|                                                     |                      |                       |
|-----------------------------------------------------|----------------------|-----------------------|
| 0-0.9 years                                         | 1.11 (0.93-1.32)     | 1.36 (1.13-1.65)      |
| 1-9 years                                           | 4.67 (3.92-5.77)     | 3.70 (2.81-4.88)      |
| 10-17 years                                         | 3.19 (2.07-4.93)     | 1.98 (1.03-3.81)      |
| 18+ years                                           | 3.70 (2.92-4.68)     | 0.82 (0.26-2.60)      |
| <b>With controls without CHD or DS as reference</b> |                      |                       |
|                                                     | 1970-1989            | 1990-2017             |
| <b>Male</b>                                         |                      |                       |
| All                                                 | 25.51 (19.18-33.92)  | 15.49 (10.87-22.06)   |
| 0-0.9 years                                         | 37.49 (20.71-67.86)  | 14.74 (9.59-22.66)    |
| 1-9 years                                           | 89.74 (38.84-207.35) | 40.82 (15.52-107.38)) |
| 10-17 years                                         | 38.24 (12.78-114.37) | 13.08 (2.19-78.29)    |
| 18+ years                                           | 9.97 (6.41-15.51)    | 3.34 (0.89-12.61)     |
| <b>Female</b>                                       |                      |                       |
| All                                                 | 31.87 (23.42-43.36)  | 25.52 (17.29-37.66)   |
| 0-0.9 years                                         | 61.74 (29.67-128.45) | 22.10 (13.51-36.14)   |
| 1-9 years                                           | 58.15 (29.94-112.94) | 35.42 (17.06-73.53)   |

|                          |                      |                      |
|--------------------------|----------------------|----------------------|
| 10-17 years              | N/A                  | 62.84 (7.74–510.99)  |
| 18+ years                | 13.78 (8.80–21.57)   | N/A                  |
| <b>Lesion complexity</b> |                      |                      |
| Complex                  |                      |                      |
| All                      | 36.06 (27.81–46.76)  | 25.53 (17.74–36.75)  |
| 0–0.9 years              | 68.70 (35.83–131.74) | 19.85 (12.84–30.70)  |
| 1–9 years                | 77.72 (42.70–141.47) | 57.52 (24.32–136.07) |
| 10-17 years              | 52.08 (17.72–153.10) | N/A                  |
| 18+ years                | 15.27 (10.35–22.51)  | N/A                  |
| Non-complex              |                      |                      |
| All                      | 19.11 (13.39–27.28)  | 14.45 (9.90–21.08)   |
| 0–0.9 years              | 27.08 (13.94–52.61)  | 15.26 (9.43–24.68)   |
| 1–9 years                | 60.49 (21.35–171.36) | 22.87 (10.13–51.63)  |
| 10-17 years              | N/A                  | 5.63 (0.94–33.68)    |
| 18+ years                | 8.15 (4.78–13.90)    | 4.25 (1.06–16.99)    |
| <b>Age groups</b>        |                      |                      |



|             |                      |                     |
|-------------|----------------------|---------------------|
| 0–0.9 years | 46.76 (29.53–74.04)  | 17.69 (12.82–24.42) |
| 1–9 years   | 70.03 (41.67–117.68) | 37.33 (20.85–66.86) |
| 10–17 years | 56.86 (19.73–163.88) | 29.43 (8.10–106.95) |
| 18+ years   | 11.62 (8.49–15.89)   | 2.78 (0.77–10.11)   |

CHD defines as congenital heart disease; DS defines as Down syndrome; HR defines as hazard ratio;

CI defines as confidence interval, N/A= Indicates to few events to estimate HR.

Figure S1. Flowchart of identification of CHD patients with DS. CHD, congenital heart disease; DS, Down syndrome.

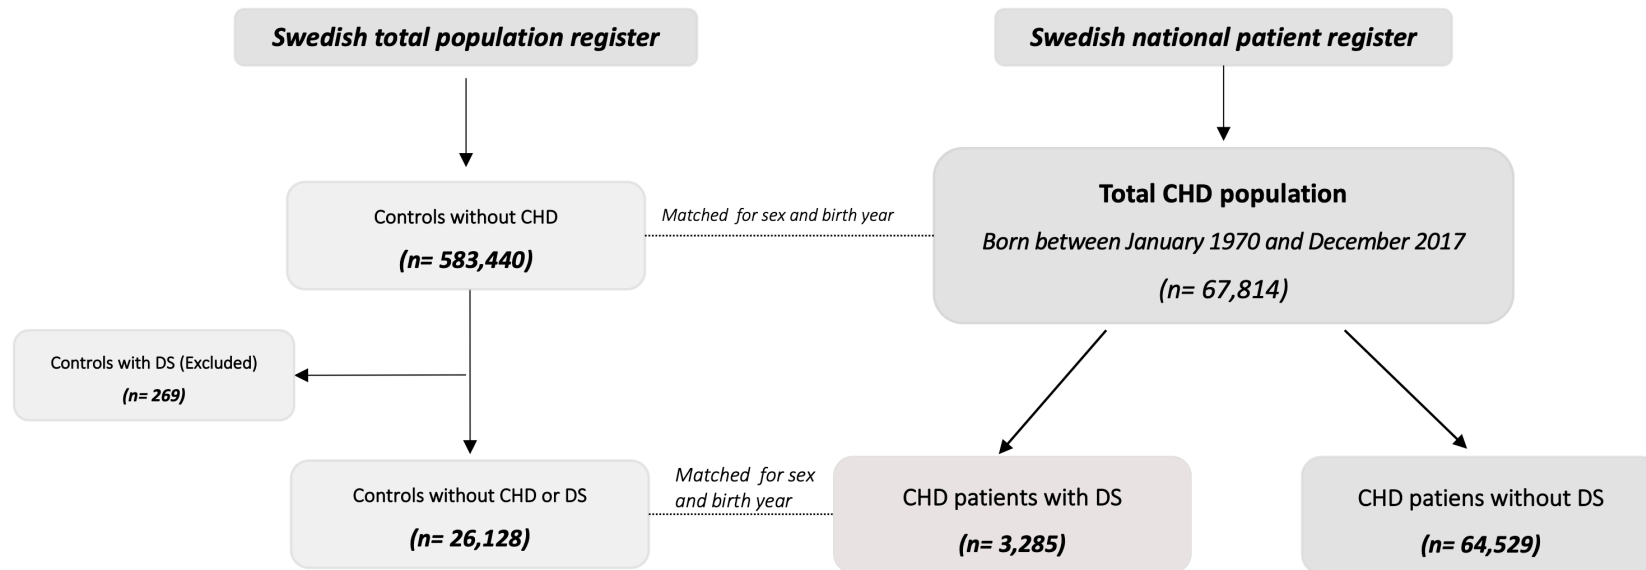

**Figure S2. Kaplan–Meier survival curves of patients with CHD and DS, matched controls, and CHD patients without DS by complexity of the lesion. CHD, congenital heart disease; DS, Down syndrome.**

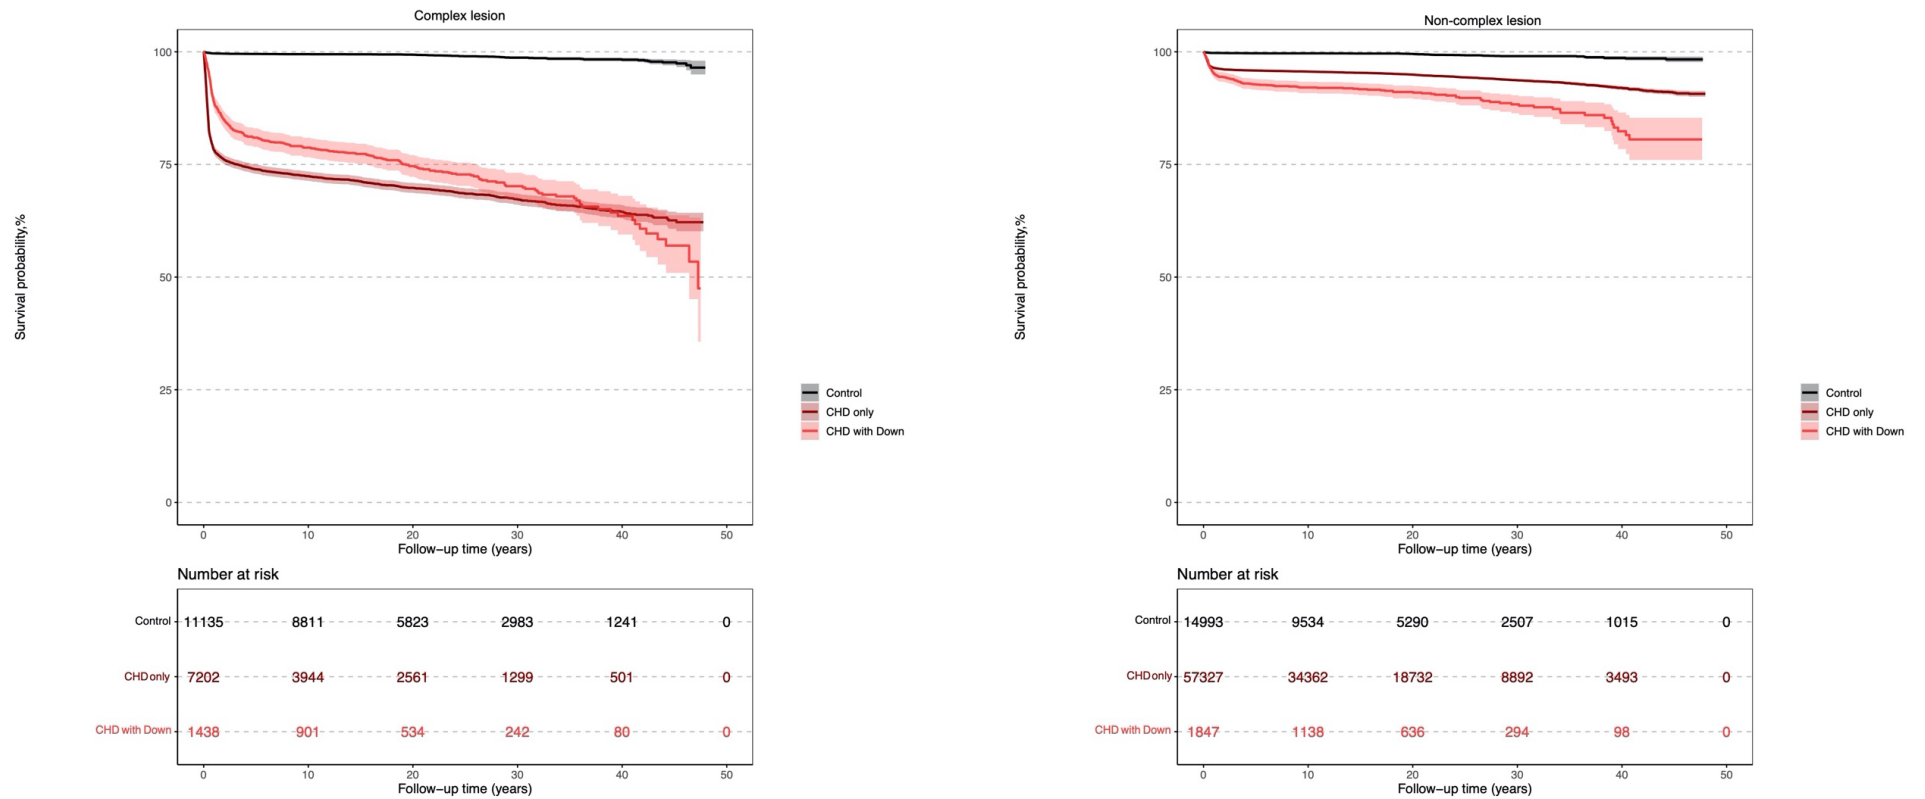

Figure S3. Kaplan–Meier survival curves of patients with CHD and DS, matched controls, and CHD patients without DS by sex. CHD, congenital heart disease; DS, Down syndrome.

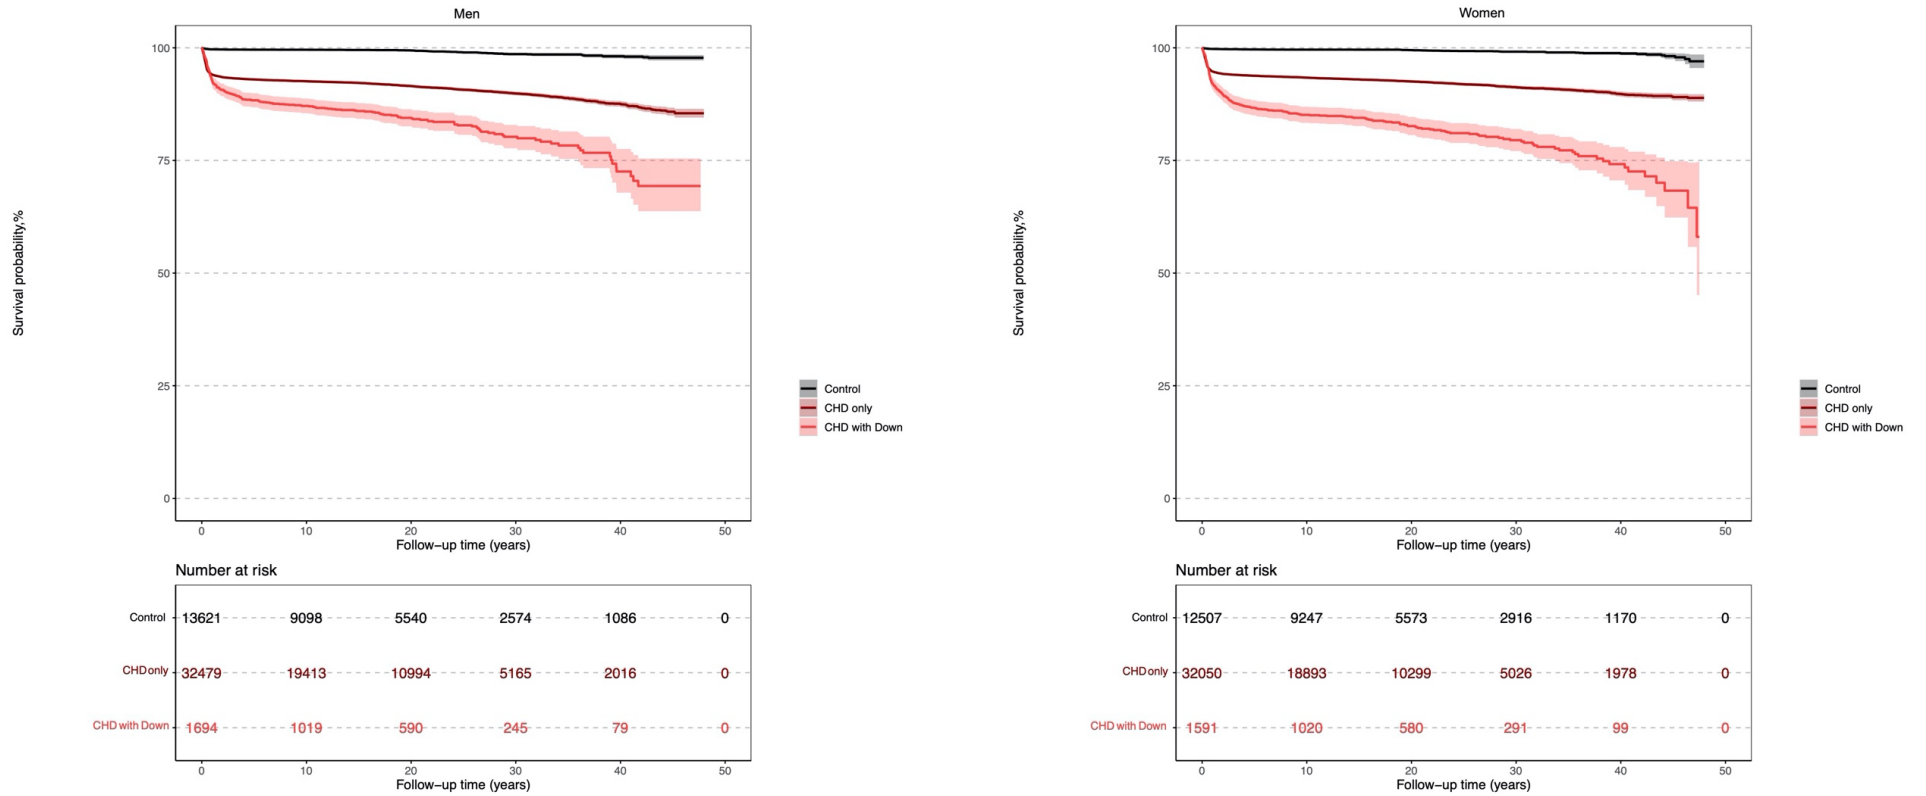

Supplement: JAH3-13-e031392-s001.pdf [file JAH3-13-e031392-s001.pdf]
